# Supplementary material
Source: publisher site journal article supplement (https://www.dovepress.com/article/553547)
Supplement: Supplementary file 1 [file 553547%20Revised%20appendix.docx]

**Appendix Part 1：Bibliometrics Literature Retrieval Formula**

| Topic | Search terms |
| --- | --- |
| Rehabilitation -related topic | TS=("Rehabilitation*" OR "Habilitation*" OR "Convalescence" OR "Self Care" OR "Self Management" OR "Physical Medicine" OR "Physiotherap*" OR "Physical Therap*" OR "Physical Activit*" OR "Activit* of Daily Living" OR "Daily Living Activit*" OR "Early Ambulation" OR "Exercis*" OR "Train*" OR "Pilates" OR "yoga" OR "Whole Body Vibration" OR "Baduanjin" OR "Baduan jin" OR "Taiji" OR "Tai Chi" OR "Electric* Stimulation" OR "Electrotherap*" OR "Shockwave Therap*" OR "Shock Wave Therap*" OR "ESWT" OR "PEMF" OR "Pulsed Electromagnetic Field*" OR "Manipulation" OR "Myofascial Release" OR "Myofascial Treatment" OR "Osteopath*" OR "Chiropract*" OR "Chiropraxis" OR "Spinal Manipulative Therap*" OR "Spinal Manipula*" OR "Acupuncture" OR "Pharmacopuncture" OR "Acupotom" OR "Dry needle*" OR "Massage" OR "Zone Therap*" OR "Athletic Tape*" OR "Orthotic Tape*" OR "Kinesio Tape*" OR "Respiratory Therap*" OR "postpartum recovery" OR "occupational therap*" OR "Speech Therap*" OR "Speech language pathologist") |
| Ultrasonography -related topic | TS=("Ultrasonography" OR "Brightness Mode Ultrasound" OR "B-mode Ultrasound" OR "Motion Type Ultrasound" OR "Doppler Mode Ultrasound" OR "D-mode Ultrasound" OR "Medical Ultrasound*" OR "Diagnostic Ultrasound*" OR "Ultrasound Imaging*" OR "Echotomography" OR "Ultrasonic Imaging*" OR "Ultrasonographic Imaging*" OR "Echography" OR "Ultrasonic Diagnoses" OR "Ultrasonic Diagnosis" OR "Ultrasonic Tomography" OR "Sonography" OR "rehabilitative ultrasound imaging" OR "Musculoskeletal Ultrasound*" OR "Ultrasonic Elastography" OR "Elastosonography") |
| NOT  Ultrasonic Therapy-related topic | TS=("Ultrasonic Therap*" OR "Therapeutic Ultrasound*" OR "Ultrasound Therap*" OR "Ultrasound Treatment*" OR "Ultrasonic Treatment*") |
| NOT Animal-related topic | TS=("Animal*" OR "Dog*" OR "Horse*" OR "Equine*" OR "Rat*" OR "Rabbit*" OR "Mouse" OR "Mice" OR "Canine*" OR "Bovine*" OR "Veterinar*") |

**Finally search in Web of Science Core Collection：**

(TS=("Rehabilitation*" OR "Habilitation*" OR "Convalescence" OR "Self Care" OR "Self Management" OR "Physical Medicine" OR "Physiotherap*" OR "Physical Therap*" OR "Physical Activit*" OR "Activit* of Daily Living" OR "Daily Living Activit*" OR "Early Ambulation" OR "Exercis*" OR "Train*" OR "Pilates" OR "yoga" OR "Whole Body Vibration" OR "Baduanjin" OR "Baduan jin" OR "Taiji" OR "Tai Chi" OR "Electric* Stimulation" OR "Electrotherap*" OR "Shockwave Therap*" OR "Shock Wave Therap*" OR "ESWT" OR "PEMF" OR "Pulsed Electromagnetic Field*" OR "Manipulation" OR "Myofascial Release" OR "Myofascial Treatment" OR "Osteopath*" OR "Chiropract*" OR "Chiropraxis" OR "Spinal Manipulative Therap*" OR "Spinal Manipula*" OR "Acupuncture" OR "Pharmacopuncture" OR "Acupotom" OR "Dry needle*" OR "Massage" OR "Zone Therap*" OR "Athletic Tape*" OR "Orthotic Tape*" OR "Kinesio Tape*" OR "Respiratory Therap*" OR "postpartum recovery" OR "occupational therap*" OR "Speech Therap*" OR "Speech language pathologist") AND TS=("Ultrasonography" OR "Brightness Mode Ultrasound" OR "B-mode Ultrasound" OR "Motion Type Ultrasound" OR "Doppler Mode Ultrasound" OR "D-mode Ultrasound" OR "Medical Ultrasound*" OR "Diagnostic Ultrasound*" OR "Ultrasound Imaging*" OR "Echotomography" OR "Ultrasonic Imaging*" OR "Ultrasonographic Imaging*" OR "Echography" OR "Ultrasonic Diagnoses" OR "Ultrasonic Diagnosis" OR "Ultrasonic Tomography" OR "Sonography" OR "rehabilitative ultrasound imaging" OR "Musculoskeletal Ultrasound*" OR "Ultrasonic Elastography" OR "Elastosonography")) NOT (TS=("Ultrasonic Therap*" OR "Therapeutic Ultrasound*" OR "Ultrasound Therap*" OR "Ultrasound Treatment*" OR "Ultrasonic Treatment*") OR TS=("Animal*" OR "Dog*" OR "Horse*" OR "Equine*" OR "Rat*" OR "Rabbit*" OR "Mouse" OR "Mice" OR "Canine*" OR "Bovine*" OR "Veterinar*"))

**Retrieved database：**Web of Science were queried: the Science Citation Index Expanded (SCIE), the Social Sciences Citation Index (SSCI), and the Emerging Sources Citation Index (ESCI)

**Search time range：** database inception to December 2024

**Refine article and reviews：**article （7601）+ reviews（756）

**Exclude retracted publications：**11

**Literature retrieval strategy：**Based on the above search requirements, this study was initiated and implemented on March 16, 2025. Two researchers (ZFS and QXZ) independently completed the initial search within one day, and a third researcher (GK) reviewed the results to address any discrepancies and ultimately determine the dataset.

**Data extraction method：**To ensure the integrity of the annual data, the search Settings cover publications from the establishment of the database to December 2024. Figure 1 illustrates the process of screening and extracting data from the retrieved literature. The original search included 8,722 articles. Through the refinement of the Wos database, 11 retracted articles were excluded. Through the CiteSpace software, 0 duplicate records were excluded. Ultimately, 8,346 articles were identified and included in the final bibliometric analysis. In particular, due to the excessive number of articles included under the metrological method (8,346 articles), it was not possible to conduct quality reading and reporting on all the included articles one by one. To improve this issue, in the subsequent supplementary materials, we conducted separate quality assessments and reports on the key literature refined by the metrological software analysis.

All the original data of the included literature were refined and extracted from the Web of Science Core Collection, and the complete records and cited literature were exported for analysis and rendering by VOSviewer and CiteSpace software.

**Appendix Part 2: Review the period of research and development in the field**

This study examined a total of 8346 articles published from database inception to December 2024 on the application of ultrasound in rehabilitation. By analyzing the growth trends of these publications, we delineated the evolution of the field into five distinct phases: the dormant phase (1977–1990), the exploratory phase (1990–2005), the fluctuating growth phase (2005–2015), and the phase of episodic explosive growth (2015–2024). The evolution of ultrasound technology in rehabilitation has unfolded across these phases, with new applications and validations emerging at each stage.

From 1977 to 1990, as ultrasound technology was introduced, rehabilitation disciplines began incorporating it into routine clinical assessments. Notable studies from this period, such as those by Heckmatt JZ et al., explored the use of B-mode ultrasound to distinguish between muscular dystrophy and spinal muscular atrophy. This period also saw the introduction of real-time ultrasound for assessing muscle [1], nerve [2], and even swallowing function [3], providing a non-invasive alternative to muscle biopsies, particularly for pediatric patients. Additionally, with the advent of Doppler ultrasound, rehabilitation professionals began evaluating its utility in assessing the efficacy and safety of manual therapy and exercise interventions [4, 5].

Between 1990 and 2005, ultrasound imaging gained widespread use for biomechanical evaluation of muscles and tendons. Real-time imaging became instrumental in observing muscle morphology and contraction, providing essential insights into muscle function [6]. Research during this period focused on using ultrasound to validate the effects of various training modalities on muscle structure and function [7, 8]. Concurrently, the clinical diagnostic and quantitative assessment capabilities of ultrasound were explored more extensively in rehabilitation contexts [9-11], although the scale of these studies remained modest.

From 2005 to 2015, rehabilitation ultrasound imaging (RUSI) began to take shape as a distinct field. The inaugural International Symposium on Rehabilitation Ultrasound Imaging, held in 2006, played a pivotal role in standardizing RUSI for use in basic, applied, and clinical rehabilitation research [12]. B-mode ultrasound allowed for detailed analysis of muscle morphology, contraction dynamics, and functional impairments. M-mode ultrasound facilitated reliable longitudinal measurements of muscle thickness, while high-frame rate M-mode ultrasound showed potential to replace electromyography (EMG) in detecting the onset of muscle activity [13]. Additionally, elastography, which quantifies soft tissue displacement and strain, emerged as a tool for evaluating tissue responses to mechanical interventions such as acupuncture [14,15]. This era marked the beginning of widespread integration of ultrasound in rehabilitation, setting the stage for explosive growth from 2011 onward, when ultrasound imaging became deeply embedded in the assessment, diagnosis, treatment, prognosis, and clinical research of rehabilitation. Ultrasound methods were included in numerous guidelines for screening, diagnosing, and rehabilitating musculoskeletal disorders [16-18]. The 2015–2024 period saw a surge in studies on interventional treatments, such as ultrasound-guided platelet-rich plasma injections [19-21], as well as the rise of real-time ultrasound imaging (RTUS) biofeedback as a novel therapeutic modality [22]. The most significant growth occurred in 2020 and 2024, when ultrasound gained recognition for its reliability and effectiveness in disease diagnosis and management [23-25], as well as its expanding role in musculoskeletal disease, bedside applications, and ultrasound-based biofeedback [26-29]. Around 2024, the rise of artificial intelligence began to bring rehabilitation ultrasound diagnosis into a new era of intelligent analysis, and a large number of new technology applications and validation studies appeared [30,31]. By 2024, the field had reached maturity, with an annual publication output of 885 articles and 20,760 citations.

**References**

[1] Dock W, Happak W, Grabenwöger F, Toifl K, Bittner R, Gruber H. Neuromuscular diseases: evaluation with high-frequency sonography. Radiology. 1990. 177(3): 825-8.

[2] Calleja Cancho E, Schawe-Calleja Cancho M, Milbradt H, Galanski M. [Ultrasonic anatomy and study technic of the normal carpal tunnel and the distal median nerve]. Rofo. 1989. 151(4): 414-8.

[3] Bu'Lock F, Woolridge MW, Baum JD. Development of co-ordination of sucking, swallowing and breathing: ultrasound study of term and preterm infants. Dev Med Child Neurol. 1990. 32(8): 669-78.

[4] Li J, Zhao W, Zhou S, Lu X, Zhang Q. [Relationship between isometric exercise and myocardial ischemia in patients with coronary artery disease: an Echo-Doppler study]. Chin Med J (Engl). 2000. 113(6): 493-7.

[5] Haynes MJ. Are the effects of local joint movement on blood flow limited to the vertebral and internal carotid arteries? Doppler studies of the ulnar artery. J Manipulative Physiol Ther. 1995. 18(9): 569-71.

[6] Hodges PW. Ultrasound imaging in rehabilitation: just a fad. J Orthop Sports Phys Ther. 2005. 35(6): 333-7.

[7] Ferreira PH, Ferreira ML, Hodges PW. Changes in recruitment of the abdominal muscles in people with low back pain: ultrasound measurement of muscle activity. Spine (Phila Pa 1976). 2004. 29(22): 2560-6.

[8] Aagaard P, Andersen JL, Dyhre-Poulsen P, et al. A mechanism for increased contractile strength of human pennate muscle in response to strength training: changes in muscle architecture. J Physiol. 2001. 534(Pt. 2): 613-23.

[9] Yamaguchi K, Tetro AM, Blam O, Evanoff BA, Teefey SA, Middleton WD. Natural history of asymptomatic rotator cuff tears: a longitudinal analysis of asymptomatic tears detected sonographically. J Shoulder Elbow Surg. 2001. 10(3): 199-203.

[10] Kraay MJ, Goldberg VM, Herbener TE. Vascular ultrasonography for deep venous thrombosis after total knee arthroplasty. Clin Orthop Relat Res. 1993. (286): 18-26.

[11] Nimityongskul P, Hudgens RA, Anderson LD, Melhem RE, Green AE Jr, Saleeb SF. Ultrasonography in the management of developmental dysplasia of the hip (DDH). J Pediatr Orthop. 1995. 15(6): 741-6.

[12] Teyhen D. Rehabilitative Ultrasound Imaging Symposium San Antonio, TX, May 8-10, 2006. J Orthop Sports Phys Ther. 2006. 36(8): A1-3.

[13] Vasseljen O, Dahl HH, Mork PJ, Torp HG. Muscle activity onset in the lumbar multifidus muscle recorded simultaneously by ultrasound imaging and intramuscular electromyography. Clin Biomech (Bristol). 2006. 21(9): 905-13.

[14] Whittaker JL, Teyhen DS, Elliott JM, et al. Rehabilitative ultrasound imaging: understanding the technology and its applications. J Orthop Sports Phys Ther. 2007. 37(8): 434-49.

[15] Langevin HM, Konofagou EE, Badger GJ, et al. Tissue displacements during acupuncture using ultrasound elastography techniques. Ultrasound Med Biol. 2004. 30(9): 1173-83.

[16] D'Agostino MA, Terslev L, Aegerter P, et al. Scoring ultrasound synovitis in rheumatoid arthritis: a EULAR-OMERACT ultrasound taskforce-Part 1: definition and development of a standardised, consensus-based scoring system. RMD Open. 2017. 3(1): e000428.

[17] Correa-de-Araujo R, Harris-Love MO, Miljkovic I, Fragala MS, Anthony BW, Manini TM. The Need for Standardized Assessment of Muscle Quality in Skeletal Muscle Function Deficit and Other Aging-Related Muscle Dysfunctions: A Symposium Report. Front Physiol. 2017. 8: 87.

[18] Goff JD, Crawford R. Diagnosis and treatment of plantar fasciitis. Am Fam Physician. 2011. 84(6): 676-82.

[19] Dragoo JL, Wasterlain AS, Braun HJ, Nead KT. Platelet-rich plasma as a treatment for patellar tendinopathy: a double-blind, randomized controlled trial. Am J Sports Med. 2014. 42(3): 610-8.

[20] Boesen AP, Hansen R, Boesen MI, Malliaras P, Langberg H. Effect of High-Volume Injection, Platelet-Rich Plasma, and Sham Treatment in Chronic Midportion Achilles Tendinopathy: A Randomized Double-Blinded Prospective Study. Am J Sports Med. 2017. 45(9): 2034-2043.

[21] de Vos RJ, Weir A, Tol JL, Verhaar JA, Weinans H, van Schie HT. No effects of PRP on ultrasonographic tendon structure and neovascularisation in chronic midportion Achilles tendinopathy. Br J Sports Med. 2011. 45(5): 387-92.

[22] Giggins OM, Persson UM, Caulfield B. Biofeedback in rehabilitation. J Neuroeng Rehabil. 2013. 10: 60.

[23] Neogi T, Jansen TL, Dalbeth N, et al. 2015 Gout classification criteria: an American College of Rheumatology/European League Against Rheumatism collaborative initiative. Ann Rheum Dis. 2015. 74(10): 1789-98.

[24] Docking SI, Ooi CC, Connell D. Tendinopathy: Is Imaging Telling Us the Entire Story. J Orthop Sports Phys Ther. 2015. 45(11): 842-52.

[25] Biceps Femoris Long Head Architecture: A Reliability and Retrospective Injury Study-Corrigendum. Med Sci Sports Exerc. 2022. 54(4): 708.

[26] Koratala A, Kazory A. Point of Care Ultrasonography for Objective Assessment of Heart Failure: Integration of Cardiac, Vascular, and Extravascular Determinants of Volume Status. Cardiorenal Med. 2021. 11(1): 5-17.

[27] Kara M, Kaymak B, Frontera W, et al. Diagnosing sarcopenia: Functional perspectives and a new algorithm from the ISarcoPRM. J Rehabil Med. 2021. 53(6): jrm00209.

[28] Argaiz ER, Koratala A, Reisinger N. Comprehensive Assessment of Fluid Status by Point-of-Care Ultrasonography. Kidney360. 2021. 2(8): 1326-1338.

[29] Bowman T, Gervasoni E, Arienti C, et al. Wearable Devices for Biofeedback Rehabilitation: A Systematic Review and Meta-Analysis to Design Application Rules and Estimate the Effectiveness on Balance and Gait Outcomes in Neurological Diseases. Sensors (Basel). 2021. 21(10): 3444.

[30] Delle Sedie A, Terslev L, Bruyn G, et al. Standardization of interstitial lung disease assessment by ultrasound: results from a Delphi process and web-reliability exercise by the OMERACT ultrasound working group. Semin Arthritis Rheum. 2024. 65: 152406.

[31] Seoni S, Shahini A, Meiburger KM, et al. All you need is data preparation: A systematic review of image harmonization techniques in Multi-center/device studies for medical support systems. Comput Methods Programs Biomed. 2024. 250: 108200.

**Appendix Part 3：Article Quality Report**

**Evaluation information of key and node literature after bibliometric analysis**

| **Article** | **Journal** | **First author** | **IF** | **JCR** | **Citation in Wos** |
| --- | --- | --- | --- | --- | --- |
| U-Net: Convolutional Networks for Biomedical Image Segmentation | Lecture Notes in Artificial Intelligence | Ronneberger, O | 0.3 | Q4 | 69256 |
| Deep Residual Learning for Image Recognition | 2016 IEEE Conference on Computer Vision and Pattern Recognition (CVPR) | He, KM | NA | NA | 134428 |
| Measurement of muscle contraction with ultrasound imaging | Muscle & Nerve | Hodges, PW | 3.1 | Q2 | 600 |
| Changes in recruitment of the abdominal muscles in people with low back pain - Ultrasound measurement of muscle activity | Spine | Ferreira, PH | 3.5 | Q1 | 335 |
| Inefficient muscular stabilization of the lumbar spine associated with low back pain - A motor control evaluation of transversus abdominis | Spine | Hodges, PW | 3.5 | Q1 | 1179 |
| The use of ultrasound imaging of the abdominal drawing-in maneuver in subjects with low back pain | Journal Of Orthopaedic & Sports Physical Therapy | Teyhen, DS | 5.8 | Q1 | 282 |
| Relationships among lateral abdominal muscles, gender, body mass index, and hand dominance | Journal Of Orthopaedic & Sports Physical Therapy | Springer, BA | 5.8 | Q1 | 139 |
| The relationship between EMG and change in thickness of transversus abdominis | [Clinical Biomechanics](https://www.ivysci.com/journals/0268-0033?lang=zh) | McMeeken, JM | 1.4 | Q3 | 282 |
| An MRI investigation into the function of the transversus abdominis muscle during "drawing-in" of the abdominal wall | Spine | Julie Anne Hides | 3.5 | Q1 | 245 |
| Reliability of Rehabilitative Ultrasound Imaging of the Transversus Abdominis and Lumbar Multifidus Muscles | Archives of Physical Medicine and Rehabilitation | Koppenhaver SL, | 3.7 | Q1 | 226 |
| Current Concepts Point-of-Care Ultrasonography | [New England Journal of Medicine](https://www.ablesci.com/journal/detail?id=DblnVp) | Moore, Christopher L. | 78.5 | Q1 | 1239 |
| An integrated ultrasound curriculum (iUSC) for medical students: 4-year experience | Ultrasound Journal | Hoppmann, RA | 2.9 | Q2 | 271 |
| International evidence-based recommendations for point-of-care lung ultrasound | Intensive Care Medicine | Volpicelli, G | 21.2 | Q1 | 2023 |
| The State of Ultrasound Education in US Medical Schools: Results of a National Survey | [Academic Medicine](https://journals.lww.com/academicmedicine/pages/default.aspx) | Bahner, David | 5.2 | Q1 | 243 |
| International Evidence-Based Recommendations for Focused Cardiac Ultrasound | [Journal of the American Society of Echocardiography](https://www.sciencedirect.com/journal/journal-of-the-american-society-of-echocardiography) | Gabriele Via | 6 | Q1 | 399 |
| A survey on deep learning in medical image analysis | [Medical Image Analysis](https://www.ivysci.com/journals/1361-8415?lang=zh) | Litjens, Geert | 11.8 | Q1 | 8280 |
| ImageNet Classification with Deep Convolutional Neural Networks | [Communications of The Acm](https://www.xueshu.com/sci/43417/) | Krizhevsky, Alex | 12.2 | Q1 | 76791 |
| ACR Thyroid Imaging, Reporting and Data System (TI-RADS): White Paper of the ACR TI-RADS Committee | [Journal of the American College of Radiology](https://www.sciencedirect.com/journal/journal-of-the-american-college-of-radiology) | Tessler FN | 5.1 | Q1 | 1652 |
| Dataset of breast ultrasound images | [Data in Brief](https://www.sciencedirect.com/journal/data-in-brief) | Al-Dhabyani | 1.4 | Q3 | 1054 |
| Sarcopenia: revised European consensus on definition and diagnosis | [Age and Ageing](https://academic.oup.com/ageing) | Alfonso J Cruz-Jentoft | 7.1 | Q1 | 9080 |
| Global Cancer Statistics 2020: GLOBOCAN Estimates of Incidence and Mortality Worldwide for 36 Cancers in 185 Countries | Ca-a Cancer Journal For Clinicians | Hyuna Sung | 232.4 | Q1 | 90438 |
| International evidence-based guidelines on Point of Care Ultrasound (POCUS) for critically ill neonates and children issued by the POCUS Working Group of the European Society of Paediatric and Neonatal Intensive Care (ESPNIC) | Critical Care | Yogen Singh | 9.3 | Q1 | 385 |
| Point-of-Care Ultrasonography | New England Journal of Medicine | José L Díaz-Gómez | 78.5 | Q1 | 262 |
| Medical Student Ultrasound Education: A WFUMB Position Paper, Part I | Ultrasound in Medicine And Biology | Christoph F Dietrich | 2.6 | Q2 | 121 |
